# Supplementary material for: Flexible transparent and hydrophobic SiNCs/PDMS coatings for anti-counterfeiting applications
Source: Royal Society of Chemistry journal article supplement (doi:10.1039/d4mh00211c), 2024-01-01
Supplement: d4mh00211c1.pdf [file d4mh00211c1.pdf]

### Supplementary Information

#### Flexible transparent and hydrophobic SiNCs/PDMS coatings for anti-counterfeit applications

Jinfeng Zhang <sup>a</sup>, Yuanfen Huang <sup>b</sup>, Xiaoyuan Zhang <sup>b</sup>, Xin Guo <sup>a</sup>, Kailong Chen <sup>b</sup>, Xiang Feng <sup>b</sup>, Jiajia

Kong <sup>b</sup>, Yanqing Liu <sup>a</sup>, Bin Shang <sup>a,b</sup>, Weilin Xu <sup>a</sup> and Dongzhi Chen <sup>a,b\*</sup>

<sup>a</sup> State Key Laboratory of New Textile Materials & Advanced Processing Technology, Wuhan Textile

University, Wuhan 430200, P. R. China

<sup>b</sup> School of Materials Science and Engineering, Wuhan Textile University, Wuhan, 430200, P. R. China

\*E-mail: chdozh\_2008@163.com

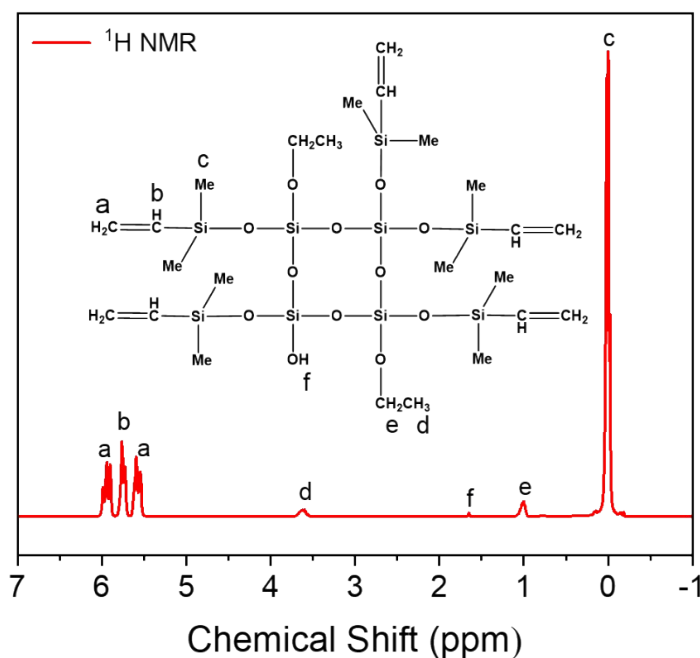

Figure S1. <sup>1</sup>H NMR of V-MQ.

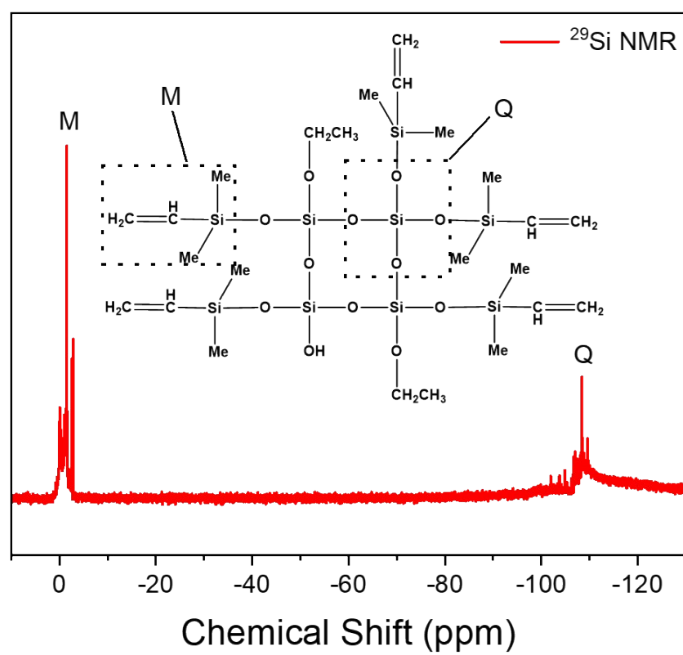

Figure S2.  $^{29}\text{Si}$  NMR of V-MQ.

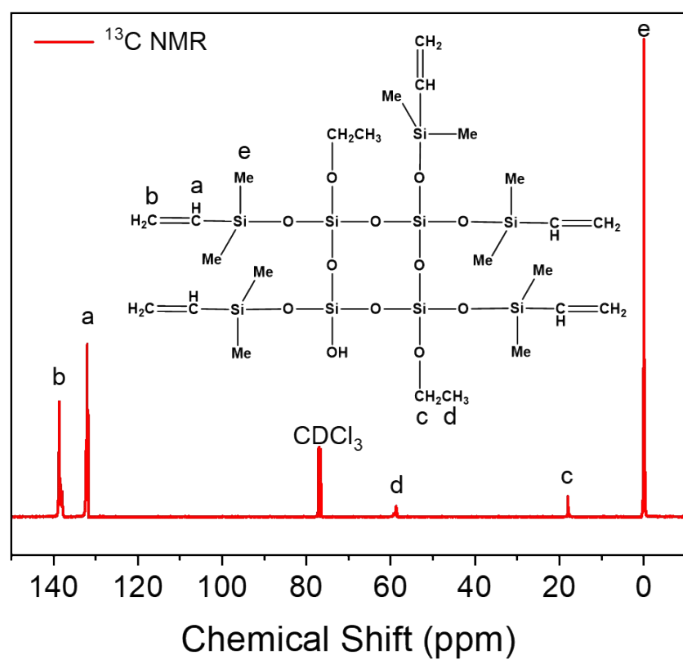

Figure S3.  $^{13}\text{C}$  NMR of V-MQ.

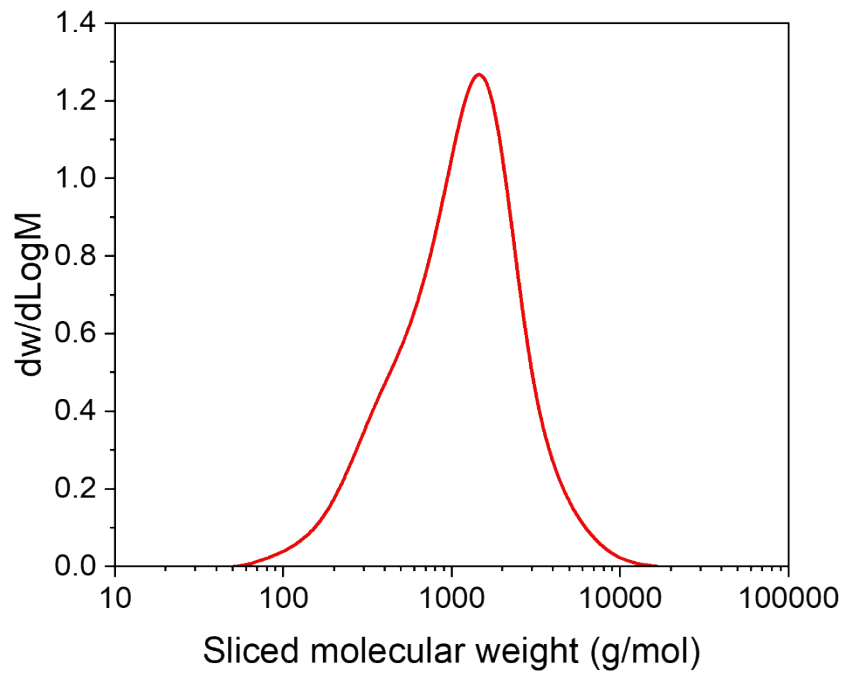

Figure S4. GPC of V-MQ.

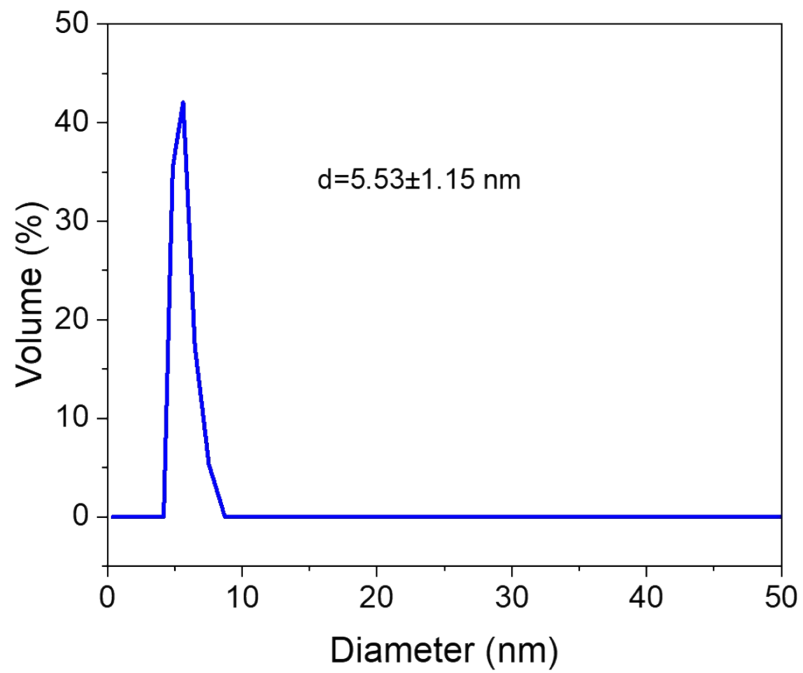

Figure S5. DLS analysis diameters of the De-SiNCs dispersed in petroleum ether.

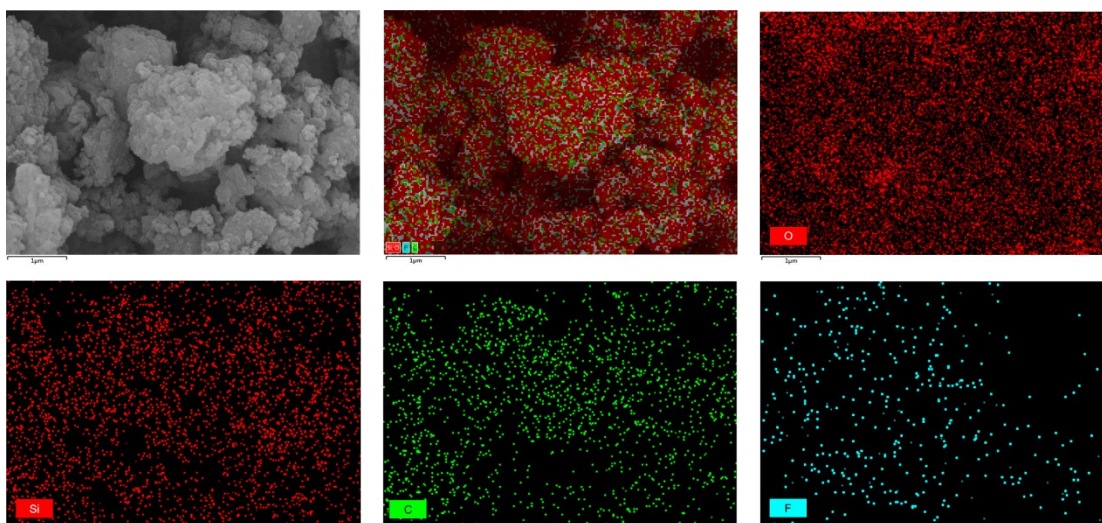

**Figure S6.** EDS of the De-SiNCs (scale of 1  $\mu\text{m}$ ).

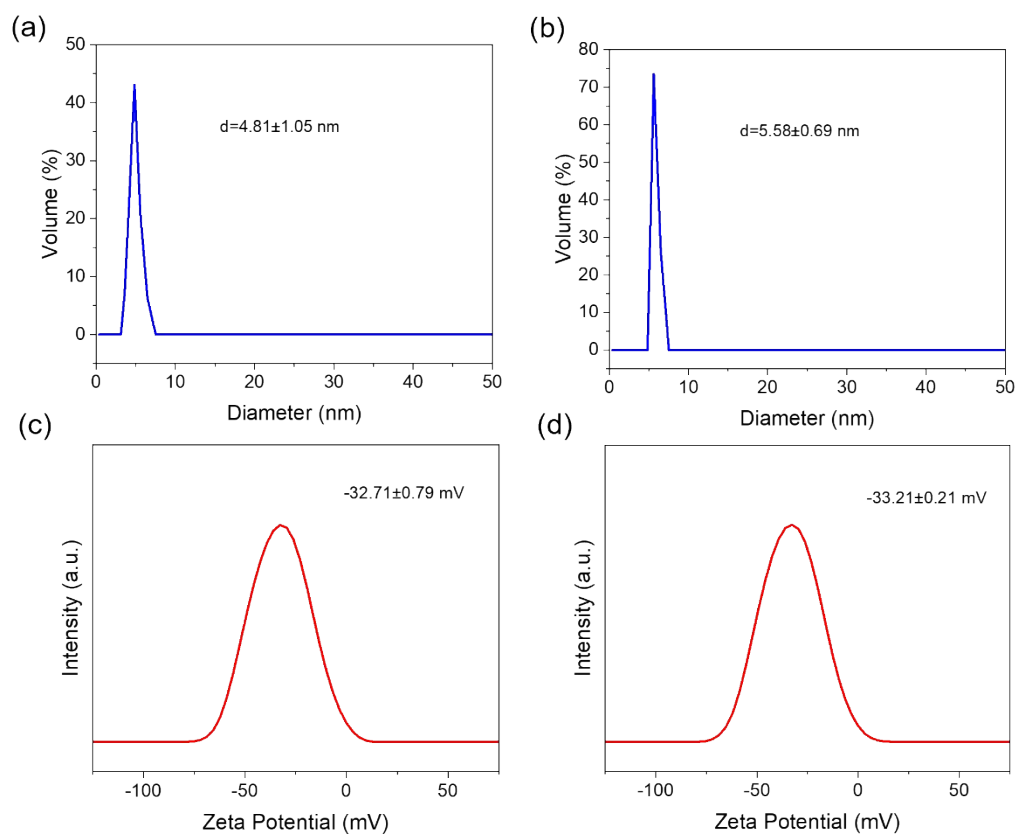

**Figure S7.** (a-b) Changes in particle size and (c-d) surface potential of De-SiNCs before and after storage for 7 days.

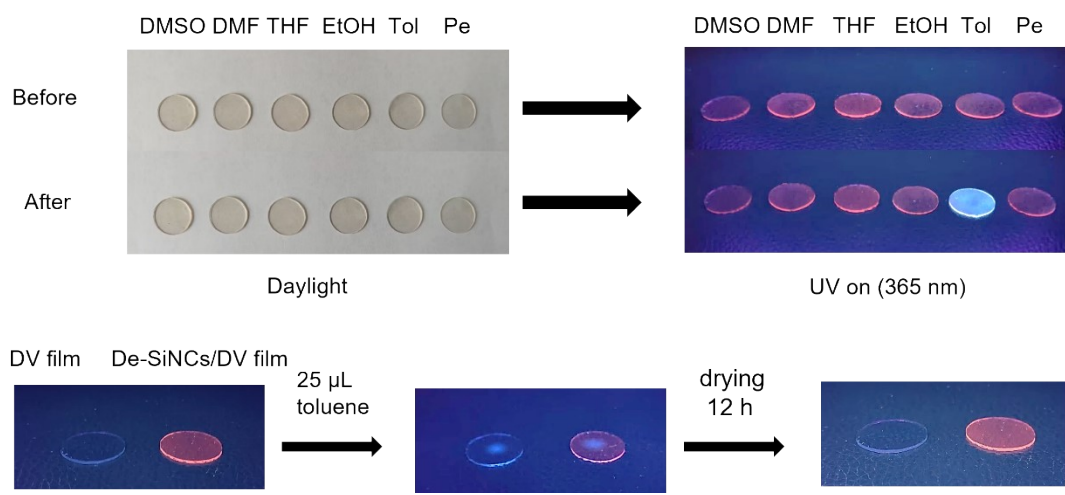

**Figure S8.** Experimental photo of solvent resistance test of DV and De-SiNCs/DV films.

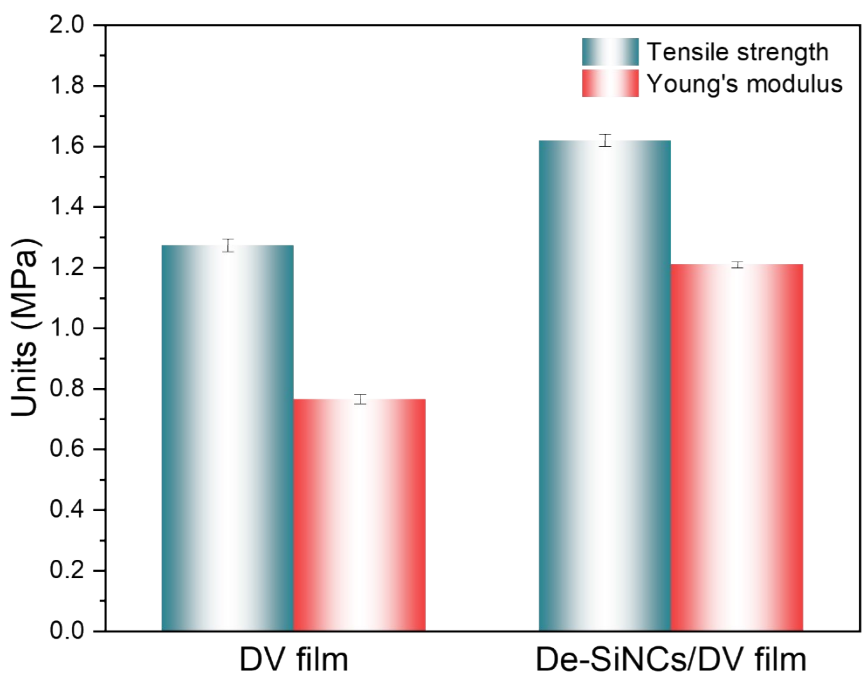

**Figure S9.** Tensile strength and Young's modulus of DV and De-SiNCs/DV films.

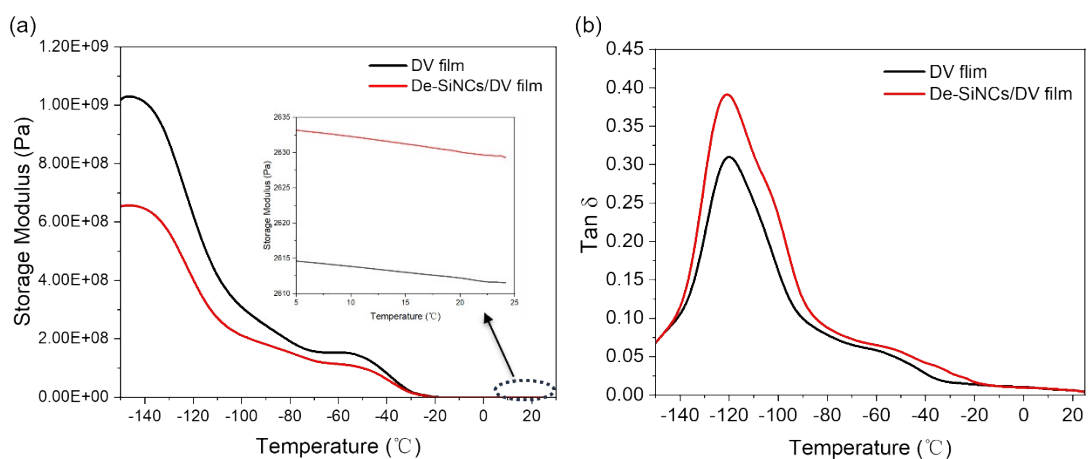

**Figure S10.** DMA curves of the DV and De-SiNCs/DV films. (a) Storage Modulus. (b) Tan  $\delta$ .

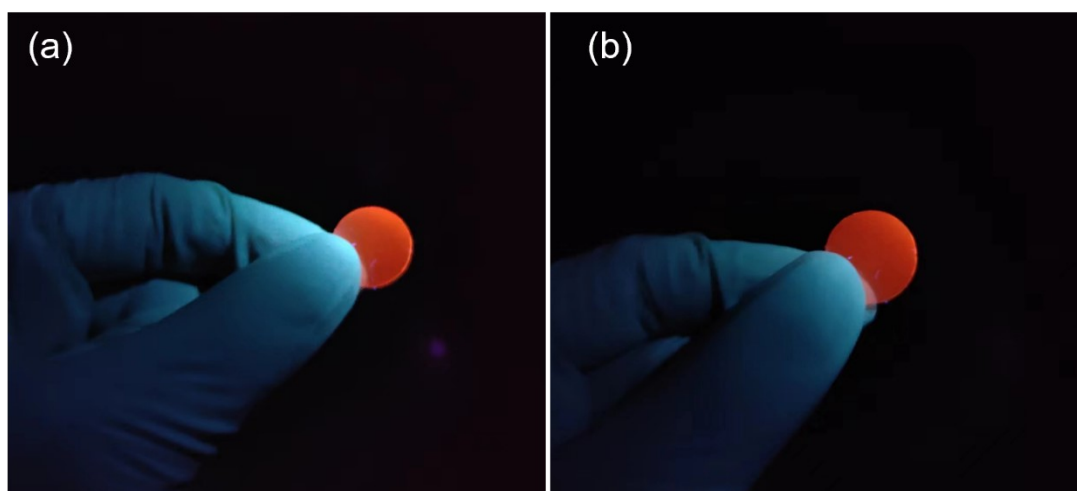

**Figure S11.** Fluorescence photographs of De-SiNCs/DV films (a) before and (b) after storage for 300 days.

**Table S1.** Important characterization data for degradation of DV and De-SiNCs/DV films.

| Sample           | Temperature for 5% weight loss (°C) | Temperature for 20% weight loss (°C) | Temperature at maximum degradative rate (°C) | Residue at 800 °C (%) | $\Delta E^a$ (kJ/mol) |
|------------------|-------------------------------------|--------------------------------------|----------------------------------------------|-----------------------|-----------------------|
| DV film          | 439.3                               | 514.1                                | 495.0                                        | 52.5                  | 45.97                 |
| De-SiNCs/DV film | 444.9                               | 525.5                                | 605.0                                        | 36.4                  | 97.63                 |

<sup>a</sup> Activation energy for the maximum degradation step of DV and De-SiNCs/DV films under a constant heat rate of 10 °C/min.
